# Supplementary material for: MAGERI: Computational pipeline for molecular-barcoded targeted resequencing
Source: PubMed Central journal article supplement (PMC5419444; doi:10.1371/journal.pcbi.1005480), 2017-05-05
Supplement: pcbi.1005480.s002.pdf [file pcbi.1005480.s002.pdf]

| Chr   | Position  | From             | To | Variant                          | Known frequency | Reference  |
|-------|-----------|------------------|----|----------------------------------|-----------------|------------|
| chr7  | 140453136 | A                | T  | BRAF_V600E,BRAF_V600K            | 0.08            | BRAF_E15   |
| chr7  | 140453136 | A                | C  | BRAF_V600G,BRAF_V600R            | 0.01            | BRAF_E15   |
| chr7  | 140453137 | C                | T  | BRAF_V600M,BRAF_V600K,BRAF_V600R | 0.01            | BRAF_E15   |
| chr7  | 55241707  | G                | A  | EGFR_G719S                       | 0.167           | EGFR_E18   |
| chr7  | 55259515  | T                | G  | EGFR_L858R                       | 0.01            | EGFR_E21   |
| chr7  | 55259524  | T                | A  | EGFR_L861Q                       | 0.01            | EGFR_E21   |
| chr7  | 55249071  | C                | T  | EGFR_T790M                       | 0.01            | EGFR_E20   |
| chr19 | 3118942   | A                | T  | GNA11_Q209L                      | 0.013           | GNA11_E5   |
| chr2  | 209113112 | C                | T  | IDH1_R132C                       | 0.013           | IDH1_E4    |
| chr2  | 209113113 | G                | A  | IDH1_R132H                       | 0.013           | IDH1_E4    |
| chr12 | 25378562  | C                | T  | KRAS_A146T                       | 0.013           | KRAS_E4    |
| chr12 | 25398284  | C                | G  | KRAS_G12A                        | 0.013           | KRAS_E2    |
| chr12 | 25398285  | C                | A  | KRAS_G12C                        | 0.013           | KRAS_E2    |
| chr12 | 25398284  | C                | T  | KRAS_G12D                        | 0.013           | KRAS_E2    |
| chr12 | 25398285  | C                | G  | KRAS_G12R                        | 0.013           | KRAS_E2    |
| chr12 | 25398285  | C                | T  | KRAS_G12S                        | 0.013           | KRAS_E2    |
| chr12 | 25398284  | C                | A  | KRAS_G12V                        | 0.013           | KRAS_E2    |
| chr12 | 25398281  | C                | T  | KRAS_G13D                        | 0.25            | KRAS_E2    |
| chr12 | 25380275  | T                | G  | KRAS_Q61H                        | 0.013           | KRAS_E3    |
| chr12 | 25380276  | T                | A  | KRAS_Q61L                        | 0.013           | KRAS_E3    |
| chr1  | 115256528 | T                | A  | NRAS_Q61H                        | 0.013           | NRAS_E3    |
| chr1  | 115256530 | G                | T  | NRAS_Q61K                        | 0.013           | NRAS_E3    |
| chr1  | 115256529 | T                | A  | NRAS_Q61L                        | 0.013           | NRAS_E3    |
| chr1  | 115256529 | T                | C  | NRAS_Q61R                        | 0.013           | NRAS_E3    |
| chr3  | 178936082 | G                | A  | PIK3CA_E542K                     | 0.013           | PIK3CA_E9  |
| chr3  | 178936091 | G                | A  | PIK3CA_E545K                     | 0.013           | PIK3CA_E9  |
| chr3  | 178952085 | A                | G  | PIK3CA_H1047R                    | 0.3             | PIK3CA_E20 |
| chr7  | 55242465  | GGGAATTAAGAGAAGC | G  | EGFR_dE746-A750                  | 0.01            | EGFR_E19   |
