# Supplementary material for: MAGERI: Computational pipeline for molecular-barcoded targeted resequencing
Source: PubMed Central journal article supplement (PMC5419444; doi:10.1371/journal.pcbi.1005480), 2017-05-05
Supplement: pcbi.1005480.s003.pdf [file pcbi.1005480.s003.pdf]

| Dataset     | Primer set | Replica | Variant ratio | Reads    | UMI found, % | Unique UMIs | Consensuses | Assembled reads,% | Aligned consensus es | Mapping rate |
|-------------|------------|---------|---------------|----------|--------------|-------------|-------------|-------------------|----------------------|--------------|
| Control DNA | 1          | 1       | NA            | 13062691 | 84%          | 45653       | 45599       | 100%              | 45146                | 99%          |
| Control DNA | 2          | 1       | NA            | 15530074 | 90%          | 50454       | 50382       | 100%              | 50372                | 100%         |
| Control DNA | 3          | 1       | NA            | 15161566 | 89%          | 46911       | 46857       | 100%              | 46819                | 100%         |
| Control DNA | 4          | 1       | NA            | 32156954 | 86%          | 28304       | 28271       | 100%              | 27603                | 98%          |
| Control DNA | 1          | 2       | NA            | 13726772 | 84%          | 46178       | 46108       | 100%              | 45617                | 99%          |
| Control DNA | 2          | 2       | NA            | 15958155 | 90%          | 47922       | 47857       | 100%              | 47833                | 100%         |
| Control DNA | 3          | 2       | NA            | 13952806 | 89%          | 41151       | 41102       | 100%              | 41062                | 100%         |
| Control DNA | 4          | 2       | NA            | 32327434 | 87%          | 27648       | 27619       | 100%              | 27259                | 99%          |
| Tru-Q 7     | 1          | 1       | 0.1           | 17460396 | 86%          | 53269       | 53178       | 99%               | 52777                | 99%          |
| Tru-Q 7     | 2          | 1       | 0.1           | 17422223 | 91%          | 38495       | 38437       | 100%              | 38433                | 100%         |
| Tru-Q 7     | 3          | 1       | 0.1           | 14055586 | 89%          | 48040       | 48007       | 100%              | 48005                | 100%         |
| Tru-Q 7     | 4          | 1       | 0.1           | 26551241 | 83%          | 34643       | 34615       | 100%              | 32434                | 94%          |
| Tru-Q 7     | 1          | 1       | 1             | 10258304 | 85%          | 20871       | 20817       | 100%              | 20354                | 98%          |
| Tru-Q 7     | 2          | 1       | 1             | 10794271 | 91%          | 18937       | 18880       | 100%              | 18846                | 100%         |
| Tru-Q 7     | 3          | 1       | 1             | 5417463  | 89%          | 17475       | 17463       | 100%              | 17452                | 100%         |
| Tru-Q 7     | 4          | 1       | 1             | 18957455 | 75%          | 14578       | 14567       | 100%              | 12608                | 86%          |
| Tru-Q 7     | 1          | 2       | 0.1           | 16075588 | 86%          | 50960       | 50863       | 99%               | 50431                | 99%          |
| Tru-Q 7     | 2          | 2       | 0.1           | 20053163 | 90%          | 39658       | 39594       | 100%              | 39583                | 100%         |
| Tru-Q 7     | 3          | 2       | 0.1           | 11839770 | 89%          | 50911       | 50873       | 100%              | 50871                | 100%         |
| Tru-Q 7     | 4          | 2       | 0.1           | 25367956 | 85%          | 29377       | 29354       | 100%              | 27637                | 94%          |
| Tru-Q 7     | 1          | 2       | 1             | 8618544  | 85%          | 19998       | 19942       | 100%              | 19457                | 97%          |
| Tru-Q 7     | 2          | 2       | 1             | 10570707 | 90%          | 17148       | 17096       | 100%              | 17076                | 100%         |
| Tru-Q 7     | 3          | 2       | 1             | 4880473  | 90%          | 13483       | 13468       | 100%              | 13464                | 100%         |
| Tru-Q 7     | 4          | 2       | 1             | 15564034 | 78%          | 12922       | 12907       | 100%              | 11206                | 87%          |
