# Supplementary material for: MAGERI: Computational pipeline for molecular-barcoded targeted resequencing
Source: PubMed Central journal article supplement (PMC5419444; doi:10.1371/journal.pcbi.1005480), 2017-05-05
Supplement: pcbi.1005480.s004.pdf [file pcbi.1005480.s004.pdf]

| Benchmark type                             | Edit distance between reference sequences (1/bp) | Error rate in reads (1/bp) | Correct hits (%) |
|--------------------------------------------|--------------------------------------------------|----------------------------|------------------|
| Highly-homologous references               | 0.01                                             | 0.01                       | 95               |
| Homologous references                      | 0.1                                              | 0.01                       | 100              |
| Non-homologous references, high error rate | 1.0                                              | 0.1                        | 99               |
