# Supplementary material for: MAGERI: Computational pipeline for molecular-barcoded targeted resequencing
Source: PubMed Central journal article supplement (PMC5419444; doi:10.1371/journal.pcbi.1005480), 2017-05-05
Supplement: pcbi.1005480.s005.pdf [file pcbi.1005480.s005.pdf]

| <b>Variant tier</b> | <b>Variant frequency</b> | <b>Number of variants</b> |
|---------------------|--------------------------|---------------------------|
| 0.1%                | $\leq 0.9\%$             | 50                        |
| 1%                  | $> 0.9\%, \leq 2\%$      | 50                        |
| 5+%                 | $> 2\%$                  | 12                        |
