# Supplementary material for: MAGERI: Computational pipeline for molecular-barcoded targeted resequencing
Source: PubMed Central journal article supplement (PMC5419444; doi:10.1371/journal.pcbi.1005480), 2017-05-05

**a**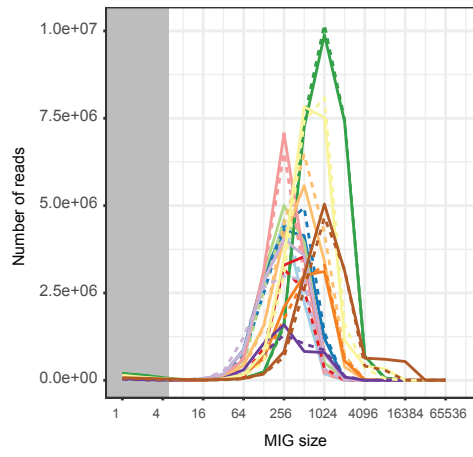**b**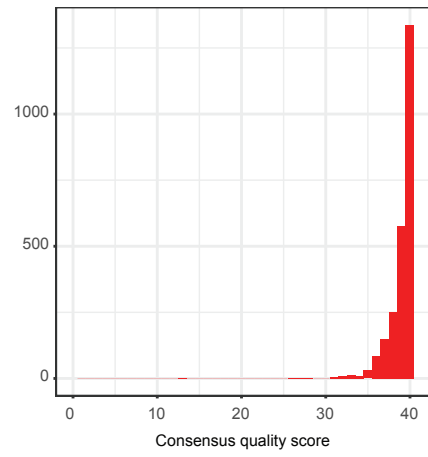**c**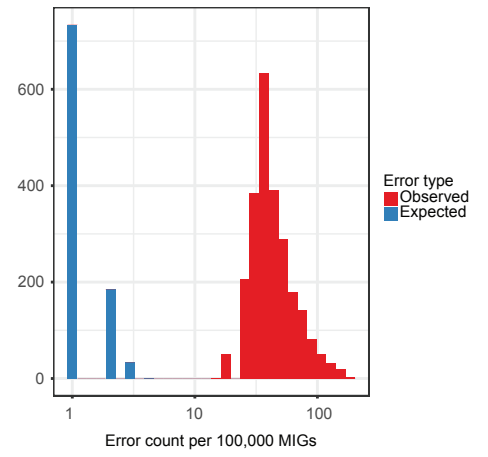

Supplement: pcbi.1005480.s007.pdf [file pcbi.1005480.s007.pdf]
